# Supplementary material for: A supramolecular complex based on a Gd-containing polyoxometalate and food-borne peptide for MRI/CT imaging and NIR-triggered photothermal therapy
Source: Royal Society of Chemistry journal article supplement (doi:10.1039/d1dt00759a), 2021-01-01
Supplement: d1dt00759a1.pdf [file d1dt00759a1.pdf]

## Supporting Information

### **A supramolecular complex based Gd-containing polyoxometalate for MRI/CT imaging and NIR-Triggered Photothermal therapy**

*Simin Zhang,<sup>a, b</sup> Meng Li,<sup>a</sup> Yuan Zhang,<sup>c</sup> Ruichun Wang,<sup>a</sup> Yukun Song,<sup>a</sup> Weiping Zhao,<sup>a</sup> and Songyi Lin<sup>\*a, b</sup>*

<sup>a</sup> National Engineering Research Center of Seafood, School of Food Science and Technology, Dalian Polytechnic University, Dalian, 116034, P. R. China.

E-mail: linsongyi730@163.com

<sup>b</sup> Collaborative Innovation Center of Seafood Deep Processing, Dalian Polytechnic University, Dalian 116034, China.

<sup>c</sup> State Key Laboratory of Inorganic Synthesis & Preparative Chemistry, College of Chemistry, Jilin University, Changchun, 130012, China.

# Supporting Information

## Table of Contents

|                                                          |    |
|----------------------------------------------------------|----|
| HPLC chromatograms.....                                  | S1 |
| MS spectra.....                                          | S1 |
| FT-IR spectra.....                                       | S2 |
| Elemental Analysis (EA).....                             | S3 |
| Zeta potential .....                                     | S3 |
| Dynamic Light Scattering (DLS) Analysis.....             | S3 |
| Isothermal titration calorimetric (ITC) Measurement..... | S4 |
| Cytotoxicity.....                                        | S4 |
| Photothermal curves.....                                 | S5 |

## Structure Characterization of the peptide

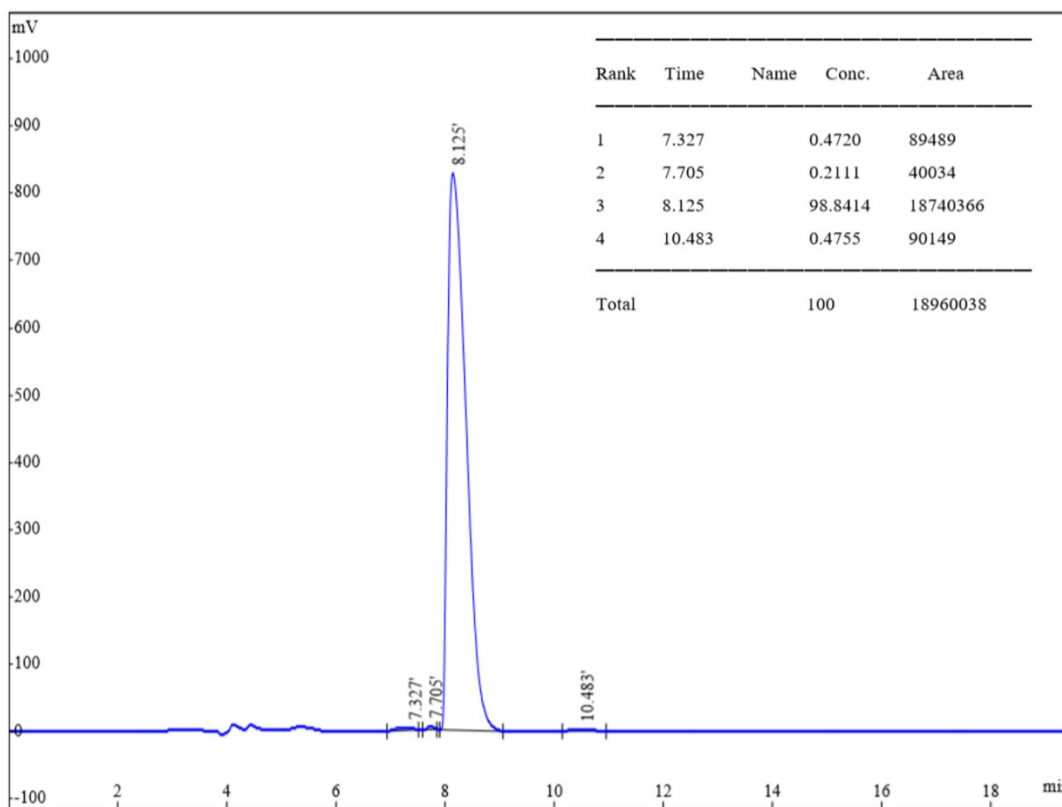

Figure S1. HPLC chromatograms of KDHCCHVTPY.

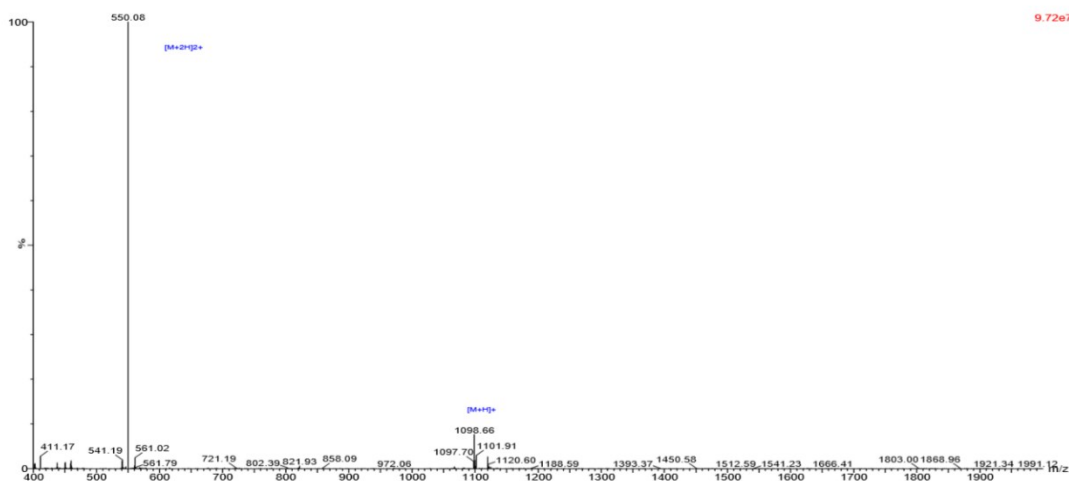

Figure S2. MALDI-TOF mass spectrum of KDHCCHVTPY peptide.

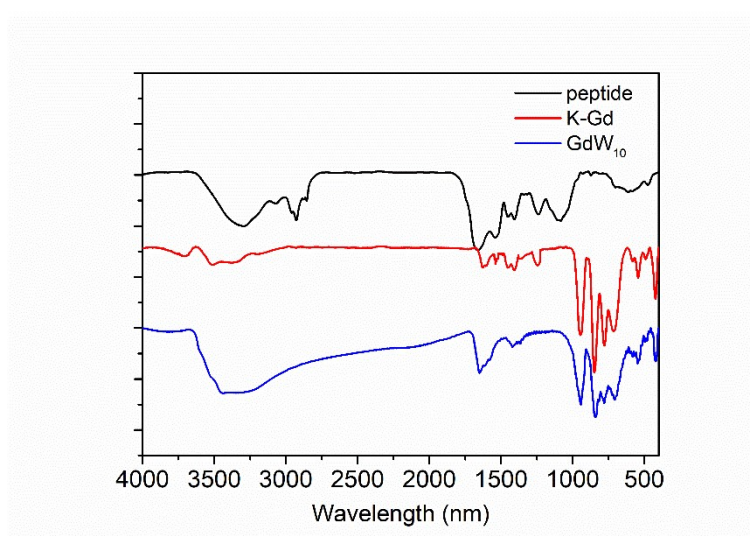

**Figure S3.** FT-IR spectra of pure GdW<sub>10</sub>, peptide KDHCHVTPY, and K-Gd in KBr pellets.

**Table S1.** The assignments of infrared spectra of pure GdW<sub>10</sub>, peptide KDHCHVTPY, and K-Gd in solid state.

| peptide /cm <sup>-1</sup> | K-Gd /cm <sup>-1</sup> | Assignment                    | peptide /cm <sup>-1</sup> | K-Gd /cm <sup>-1</sup> | Assignment          |
|---------------------------|------------------------|-------------------------------|---------------------------|------------------------|---------------------|
| 1672                      | 1672                   | -CO-NH-                       | 1000-1300                 | 1000-1300              | C-O, C-OH, C-N      |
| 1538                      | 1538                   | C=C frame<br>str.             |                           | 946                    | W=O <sub>d</sub>    |
| 1450                      | 1452                   | CH <sub>2</sub><br>scissoring |                           | 847                    | W-O <sub>b</sub> -W |
| 1411                      | 1408                   | CH <sub>2</sub><br>wagging    |                           | 782                    | W-O <sub>c</sub> -W |
| 1335                      | 1333                   | CH <sub>2</sub><br>wagging    |                           | 714                    | W-O <sub>c</sub> -W |
| 1248                      | 1252                   | CH <sub>2</sub><br>twisting   | 722                       | 722                    | C-S                 |

**Table S2.** The summary of elemental analysis for the prepared complex K-Gd.<sup>[a]</sup>

|            | C     | H    | N    | S    | Gd   | W     |
|------------|-------|------|------|------|------|-------|
| Calcd. (%) | 27.49 | 3.36 | 9.35 | 1.53 | 3.75 | 43.83 |
| Found (%)  | 27.12 | 3.55 | 9.23 | 1.33 | 3.69 | 43.55 |

[a] The elemental analytical results of C, H, N and S were obtained from organic elemental analysis, and the elemental analysis of Gd, W was performed on inductive coupled plasma emission spectrometer.

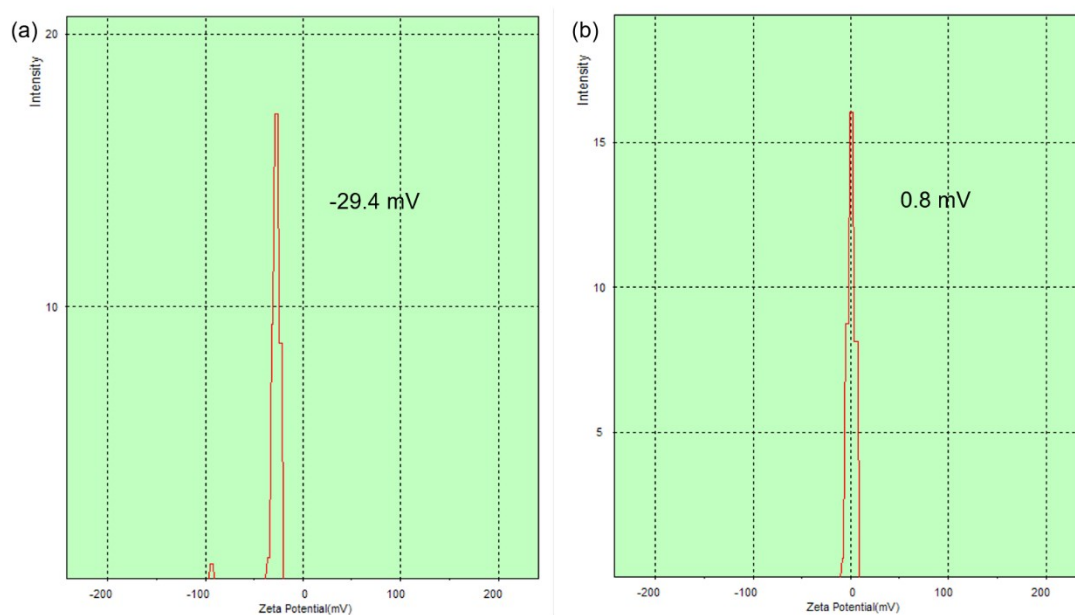

**Figure S4.** Zeta potential of (a) GdW<sub>10</sub> and (b) K-Gd in aqueous solution.

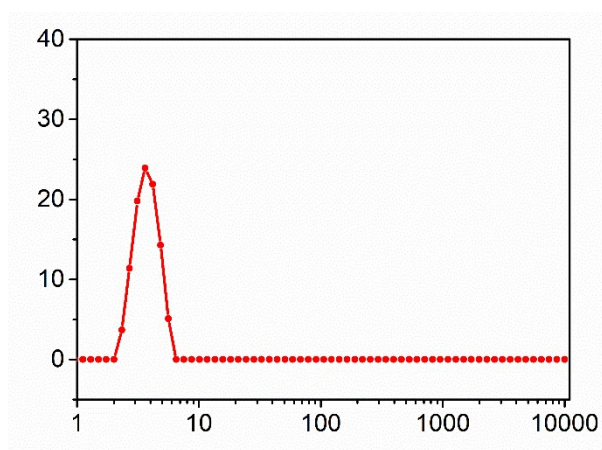

**Figure S5.** DLS curves of K-Gd in dulbecco's modified eagle medium (DMEM) culture medium solution.

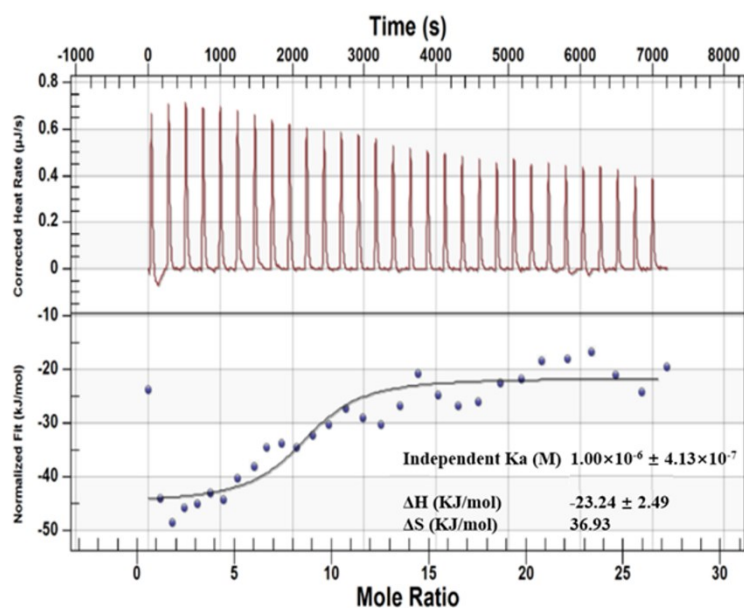

**Figure S6.** Isothermal titration calorimetric curves of the thermogram and the isotherm corresponding to  $GdW_{10}$  binding to peptide Lys-Asp-His-Cys-His-Val-Thr-Pro-Tyr.

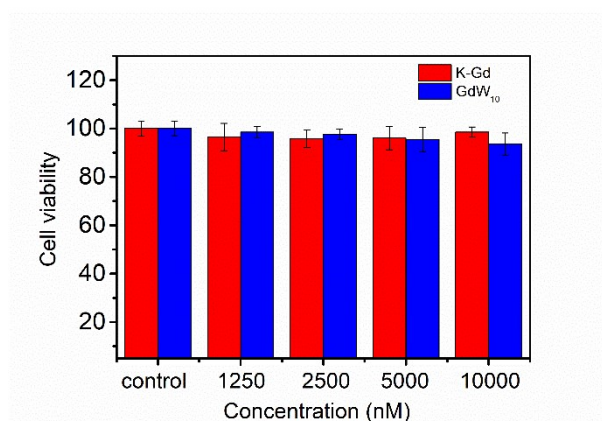

**Figure S7.** Columnar plots of viability of HepG2 cells after incubation for 24 h in the presence of K-Gd and  $GdW_{10}$  versus the increase in their concentrations.

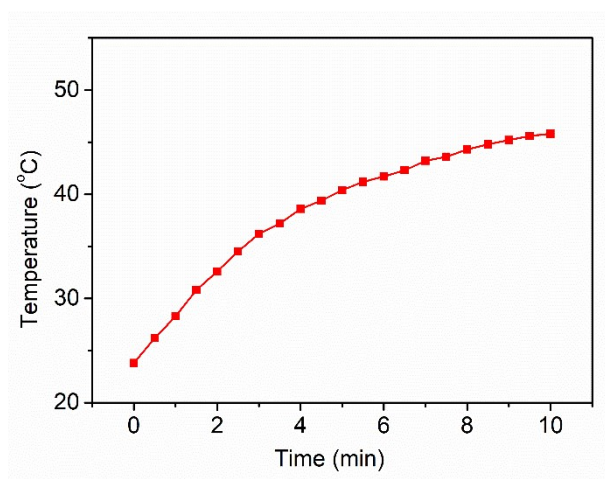

**Figure S8.** Photothermal heating curves of rK-Gd aqueous solution under 808 nm laser irradiation at a power density of 0.5 W/cm<sup>2</sup> for 10 min.
